# Supplementary material for: Broad-Spectrum Detection of HPV in Male Genital Samples Using Target-Enriched Whole-Genome Sequencing
Source: MDPI journal article supplement (doi:10.3390/v15091967), 2023-09-21
Supplement: s1 [file s1]

**Table S1:** Sample arrangement and DNA input for library preparations

| Sample No. | Specimen                             | DNA input/reaction (ng*) | Placental DNA (ng) | Capture library (#) | Sequencing library (#) |   |
|------------|--------------------------------------|--------------------------|--------------------|---------------------|------------------------|---|
| 1          | Genital swab                         | 13.6                     | 86.4               | 1                   | 1                      |   |
| 2          | Genital swab                         | 19.5                     | 80.5               |                     |                        |   |
| 3          | Genital swab                         | 16.7                     | 83.3               |                     |                        |   |
| 4          | Genital swab                         | 23.6                     | 76.4               |                     |                        |   |
| 5          | Genital swab                         | 28.0                     | 72.0               |                     |                        |   |
| 6          | Genital swab                         | 14.7                     | 85.3               |                     |                        |   |
| 7          | Genital swab                         | 19.6                     | 80.4               |                     |                        |   |
| 8          | Genital swab                         | 100.0                    | 0.0                |                     |                        |   |
| 9          | Genital swab                         | 13.0                     | 87.0               |                     |                        |   |
| 10         | Genital swab                         | 15.8                     | 84.2               |                     |                        |   |
| 11         | Genital swab                         | 21.0                     | 79.0               |                     |                        |   |
| 12         | Genital swab                         | 30.6                     | 69.4               |                     |                        |   |
| 13         | Genital swab                         | 12.6                     | 87.4               |                     |                        |   |
| 14         | Genital swab                         | 18.4                     | 81.6               |                     |                        |   |
| 15         | H <sub>2</sub> O                     | 0.0                      | 0.0                |                     |                        |   |
| 16         | SiHa                                 | 10.0                     | 90.5               |                     |                        |   |
| 17         | Genital swab                         | 13.7                     | 86.3               | 2                   |                        | 1 |
| 18         | Genital swab                         | 14.7                     | 85.3               |                     |                        |   |
| 19         | Genital swab                         | 28.1                     | 71.9               |                     |                        |   |
| 20         | Genital swab                         | 100.0                    | 0.0                |                     |                        |   |
| 21         | Genital swab                         | 11.1                     | 88.9               |                     |                        |   |
| 22         | Genital swab                         | 26.5                     | 73.5               |                     |                        |   |
| 23         | Genital swab                         | 52.5                     | 47.5               |                     |                        |   |
| 24         | Genital swab                         | 12.4                     | 87.6               |                     |                        |   |
| 25         | Genital swab                         | 17.9                     | 82.1               |                     |                        |   |
| 26         | Genital swab                         | 13.4                     | 86.6               |                     |                        |   |
| 27         | Genital swab                         | 19.5                     | 80.5               |                     |                        |   |
| 28         | Genital swab                         | 17.3                     | 82.7               |                     |                        |   |
| 29         | Genital swab                         | 33.2                     | 66.8               |                     |                        |   |
| 30         | Placenta                             | 100.0                    | 100.5              |                     |                        |   |
| 31         | Plasmid pool (HPV11, 16, 31, 45, 52) | 625 copies/plasmid       | 100.0              |                     |                        |   |
| 32         | Genital swab                         | 12.8                     | 87.2               | 3                   | 2                      |   |
| 33         | Genital swab                         | 14.1                     | 85.9               |                     |                        |   |
| 34         | Genital swab                         | 19.4                     | 80.6               |                     |                        |   |
| 35         | Genital swab                         | 100.0                    | 0.0                |                     |                        |   |
| 36         | Genital swab                         | 22.8                     | 77.2               |                     |                        |   |
| 37         | Genital swab                         | 26.9                     | 73.1               |                     |                        |   |
| 38         | Genital swab                         | 18.3                     | 81.7               |                     |                        |   |
| 39         | Genital swab                         | 10.9                     | 89.1               |                     |                        |   |
| 40         | Genital swab                         | 17.8                     | 82.2               |                     |                        |   |
| 41         | Genital swab                         | 24.0                     | 76.0               |                     |                        |   |
| 42         | Genital swab                         | 12.5                     | 87.5               |                     |                        |   |
| 43         | HPV plasmid pool (5,8,23,26)#        | 625 copies               | 100.0              |                     |                        |   |
| 44         | Plasmid pool (HPV6,16,20,24,36,58)&  | 625 copies               | 100.0              |                     |                        |   |
| 45         | HPV plasmid pool (5,11,15,45,52)     | 625 copies               | 100.0              |                     |                        |   |
| 46         | H <sub>2</sub> O                     | 0.0                      | 0.0                |                     |                        |   |
| 47         | SiHa                                 | 10.0                     | 90.0               |                     |                        |   |
| 48         | Genital swab                         | 28.7                     | 71.3               | 4                   |                        | 2 |
| 49         | Genital swab                         | 100.0                    | 0.0                |                     |                        |   |
| 50         | Genital swab                         | 15.1                     | 84.9               |                     |                        |   |
| 51         | Genital swab                         | 29.9                     | 70.1               |                     |                        |   |
| 52         | Genital swab                         | 28.4                     | 71.6               |                     |                        |   |
| 53         | Genital swab                         | 40.7                     | 59.3               |                     |                        |   |
| 54         | Genital swab                         | 12.2                     | 87.8               |                     |                        |   |
| 55         | Genital swab                         | 18.1                     | 81.9               |                     |                        |   |

|    |                                        |                    |       |  |  |
|----|----------------------------------------|--------------------|-------|--|--|
| 56 | Genital swab                           | 34.0               | 66.0  |  |  |
| 57 | Genital swab                           | 12.0               | 88.0  |  |  |
| 58 | Genital swab                           | 49.7               | 50.3  |  |  |
| 59 | Genital swab                           | 10.3               | 89.7  |  |  |
| 60 | HPV plasmid pool (15,20,24,48)         | 625 copies/plasmid | 100.0 |  |  |
| 61 | HPV plasmid pool (8,18,23,31,33,48,53) | 625 copies/plasmid | 100.0 |  |  |
| 62 | Placenta                               | 100.0              | 100.0 |  |  |
| 63 | HPV plasmid pool (6,33,18,53, 58)      | 625 copies/plasmid | 100.0 |  |  |

\*Placental DNA was added to the indicated DNA input from genital swabs to make it 100 ng for the library preparation.

#HPV5 was cloned in 2 separate plasmids (1.9kb and 5.8kb, respectively)

& HPV24 was cloned in 2 separate plasmids (2.8 kb and 5.1kb, respectively)

Table S2. HPV type determination in controls

| Sample No. | Sample description                                | Mapped reads | Fraction of reference covered | HPV Type call |                  |             |
|------------|---------------------------------------------------|--------------|-------------------------------|---------------|------------------|-------------|
|            |                                                   |              |                               | eWGS          | Expected         | Concordance |
| 15         | H <sub>2</sub> O                                  |              |                               | HPV-          | HPV-             | Yes         |
| 16         | Siha                                              | 21995        | 0.95                          | 16            | 16               | Yes         |
| 30         | Placenta                                          |              |                               | HPV-          | HPV-             | Yes         |
| 31         | 5 HPV plasmids (45,52,16,11,31)                   | 4434         | 1.00                          | 11            | 11,16,31,45,52   | Yes         |
|            |                                                   | 6162         | 1.00                          | 16            |                  |             |
|            |                                                   | 4306         | 1.00                          | 31            |                  |             |
|            |                                                   | 6239         | 1.00                          | 52            |                  |             |
|            |                                                   | 6494         | 0.99                          | 45            |                  |             |
| 43         | 4 HPV plasmids (36,23,8,5-5.8kb,5-1.9kb)          | 3622         | 1.00                          | 8             | 5,8,23,36        | Yes         |
|            |                                                   | 3726         | 1.00                          | 23            |                  |             |
|            |                                                   | 4051         | 1.00                          | 36            |                  |             |
|            |                                                   | 3255         | 0.99                          | 5             |                  |             |
| 44         | 7 HPV plasmids (6,16,24-5.1kb, 24-1.8kb,20,36,58) | 6174         | 1.00                          | 16            | 6,16,20,24,36,58 | Yes         |
|            |                                                   | 4593         | 1.00                          | 24            |                  |             |
|            |                                                   | 6246         | 1.00                          | 58            |                  |             |
|            |                                                   | 3260         | 1.00                          | 6             |                  |             |
|            |                                                   | 5424         | 1.00                          | 36            |                  |             |
|            |                                                   | 4007         | 1.00                          | 20            |                  |             |
| 45         | 6 HPV plasmids:5-5.8kb,5-1.9kb,11,15,45,52)       | 3373         | 1.00                          | 15            | 5,11,15,45,52    | Yes         |
|            |                                                   | 5504         | 1.00                          | 52            |                  |             |
|            |                                                   | 4823         | 1.00                          | 11            |                  |             |
|            |                                                   | 3704         | 0.99                          | 5             |                  |             |
|            |                                                   | 6092         | 0.99                          | 45            |                  |             |
| 46         | H <sub>2</sub> O                                  |              |                               | HPV-          | HPV-             | Yes         |
| 47         | SiHa                                              | 23932        | 0.95                          | 16            | 16               | Yes         |
| 60         |                                                   | 5020         | 1.00                          | 24            | 15,20,24,48      | Yes         |

|    |                                                 |      |      |      |                     |     |
|----|-------------------------------------------------|------|------|------|---------------------|-----|
| 61 | 5 HPV plasmids<br>(15,20,24-5.1kb, 24-1.8kb,48) | 3913 | 1.00 | 15   | 8,18,23,31,33,48,53 | Yes |
|    |                                                 | 4706 | 1.00 | 48   |                     |     |
|    |                                                 | 4385 | 0.99 | 20   |                     |     |
|    | 7 HPV plasmids<br>(8,18,23,31,33,48,53)         | 6451 | 1.00 | 18   |                     |     |
|    |                                                 | 4441 | 1.00 | 23   |                     |     |
|    |                                                 | 4448 | 1.00 | 31   |                     |     |
|    |                                                 | 5897 | 1.00 | 33   |                     |     |
|    |                                                 | 3898 | 1.00 | 48   |                     |     |
|    |                                                 | 7396 | 1.00 | 53   |                     |     |
|    |                                                 | 4197 | 1.00 | 8    |                     |     |
| 62 | Placenta                                        |      |      | HPV- | HPV-                | Yes |
| 63 | 5 plasmids<br>(6,33,18,58,53)                   | 7277 | 1.00 | 18   | 6,33,18,58,53       | Yes |
|    |                                                 | 7621 | 1.00 | 33   |                     |     |
|    |                                                 | 8993 | 1.00 | 53   |                     |     |
|    |                                                 | 7547 | 1.00 | 58   |                     |     |
|    |                                                 | 4102 | 1.00 | 6    |                     |     |

All controls were tested in duplicate, and within each plasmid pool, the individual types were present at the same copy number (625 copies/reaction). The 13 control samples gave the expected results : the SiHa cell line was positive for HPV16 and no reads from HPV negative controls were mapped to HPV genomes. The mean number of mapped reads/HPV type in the plasmid pool was  $5160.8 \pm 235$ . Further, all 18 HPV types in various plasmid pools were 100% concordant to the expected types in these pools.

**Table S3.** Multi-genera detection of HPV in male genitals identified by eWGS.

| Sample# | Alpha | Beta | Gamma | Mu | Types# |
|---------|-------|------|-------|----|--------|
| 3       | 4     | 5    | 1     | 0  | 10     |
| 4       | 0     | 4    | 1     | 0  | 5      |
| 5       | 4     | 1    | 0     | 0  | 5      |
| 7       | 2     | 4    | 14    | 0  | 20     |
| 8       | 1     | 4    | 2     | 0  | 7      |
| 9       | 1     | 1    | 0     | 0  | 2      |
| 10      | 0     | 0    | 2     | 1  | 3      |
| 11      | 5     | 1    | 4     | 1  | 11     |
| 12      | 7     | 7    | 5     | 0  | 19     |
| 17      | 0     | 0    | 1     | 0  | 1      |
| 19      | 3     | 4    | 25    | 0  | 32     |
| 20      | 2     | 1    | 1     | 0  | 4      |
| 21      | 7     | 6    | 19    | 0  | 32     |
| 22      | 11    | 25   | 49    | 0  | 85     |
| 23      | 0     | 9    | 5     | 0  | 14     |
| 26      | 0     | 0    | 1     | 0  | 1      |
| 27      | 0     | 3    | 1     | 0  | 4      |
| 28      | 0     | 16   | 14    | 0  | 30     |
| 29      | 0     | 4    | 10    | 0  | 14     |

|       |     |     |     |   |     |
|-------|-----|-----|-----|---|-----|
| 30    | 3   | 3   | 7   | 0 | 13  |
| 33    | 0   | 4   | 1   | 0 | 5   |
| 34    | 4   | 2   | 6   | 0 | 12  |
| 35    | 6   | 1   | 3   | 0 | 10  |
| 37    | 1   | 11  | 4   | 0 | 16  |
| 38    | 0   | 6   | 0   | 0 | 6   |
| 39    | 1   | 2   | 1   | 0 | 4   |
| 40    | 4   | 5   | 11  | 0 | 20  |
| 41    | 2   | 1   | 2   | 0 | 5   |
| 42    | 1   | 5   | 5   | 0 | 11  |
| 43    | 0   | 5   | 0   | 0 | 5   |
| 49    | 1   | 1   | 2   | 0 | 4   |
| 50    | 2   | 0   | 8   | 0 | 10  |
| 51    | 3   | 4   | 9   | 0 | 16  |
| 52    | 0   | 2   | 0   | 0 | 2   |
| 53    | 2   | 1   | 1   | 0 | 4   |
| 54    | 3   | 0   | 6   | 0 | 9   |
| 55    | 21  | 21  | 20  | 0 | 62  |
| 56    | 4   | 3   | 8   | 0 | 15  |
| 57    | 5   | 2   | 3   | 0 | 10  |
| 58    | 5   | 5   | 2   | 0 | 12  |
| 59    | 7   | 0   | 3   | 0 | 10  |
| Total | 122 | 179 | 257 | 2 | 560 |

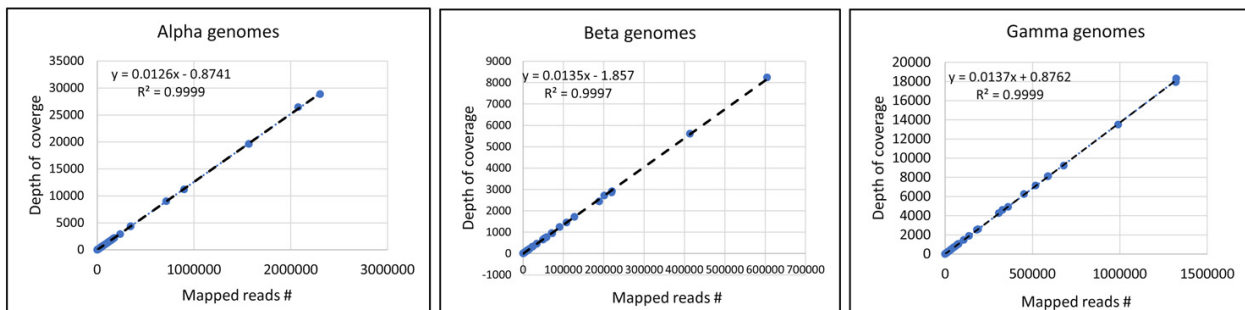

**Figure S1:** Linear relationship between number of reads and depth of coverage.

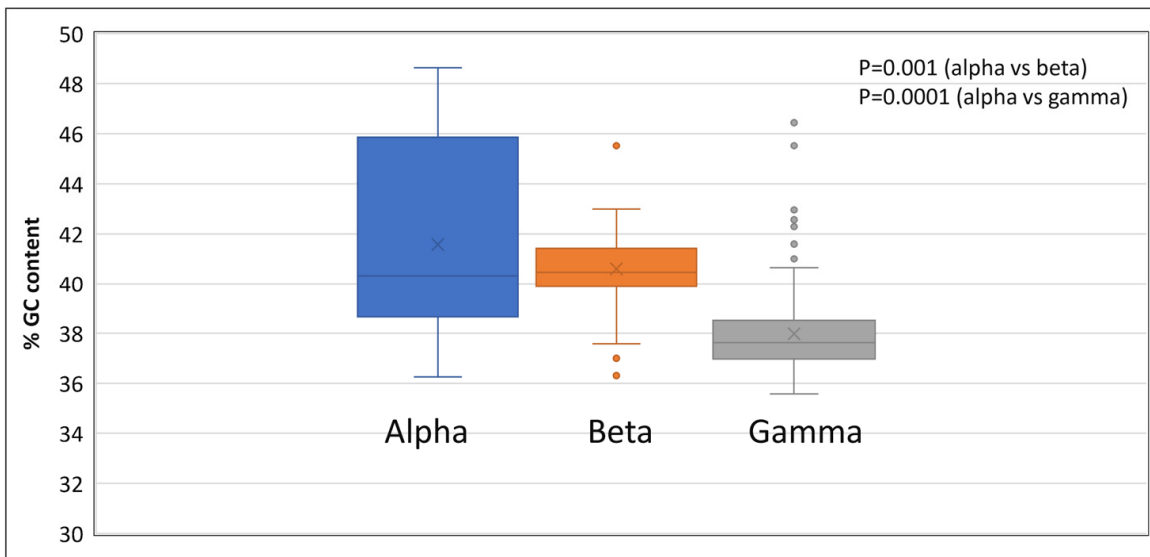

**Figure S2:** GC content (%) of alpha, beta, and gamma genomes in male genitals.
